# Supplementary material for: Spatially Explicit Trends in the Global Conservation Status of Vertebrates
Source: PLOS journal article supplement (doi:10.1371/journal.pone.0113934), 2014-11-26
Supplement: S1 (10.1371/journal.pone.0113934.s001) [file journal.pone.0113934.s001]

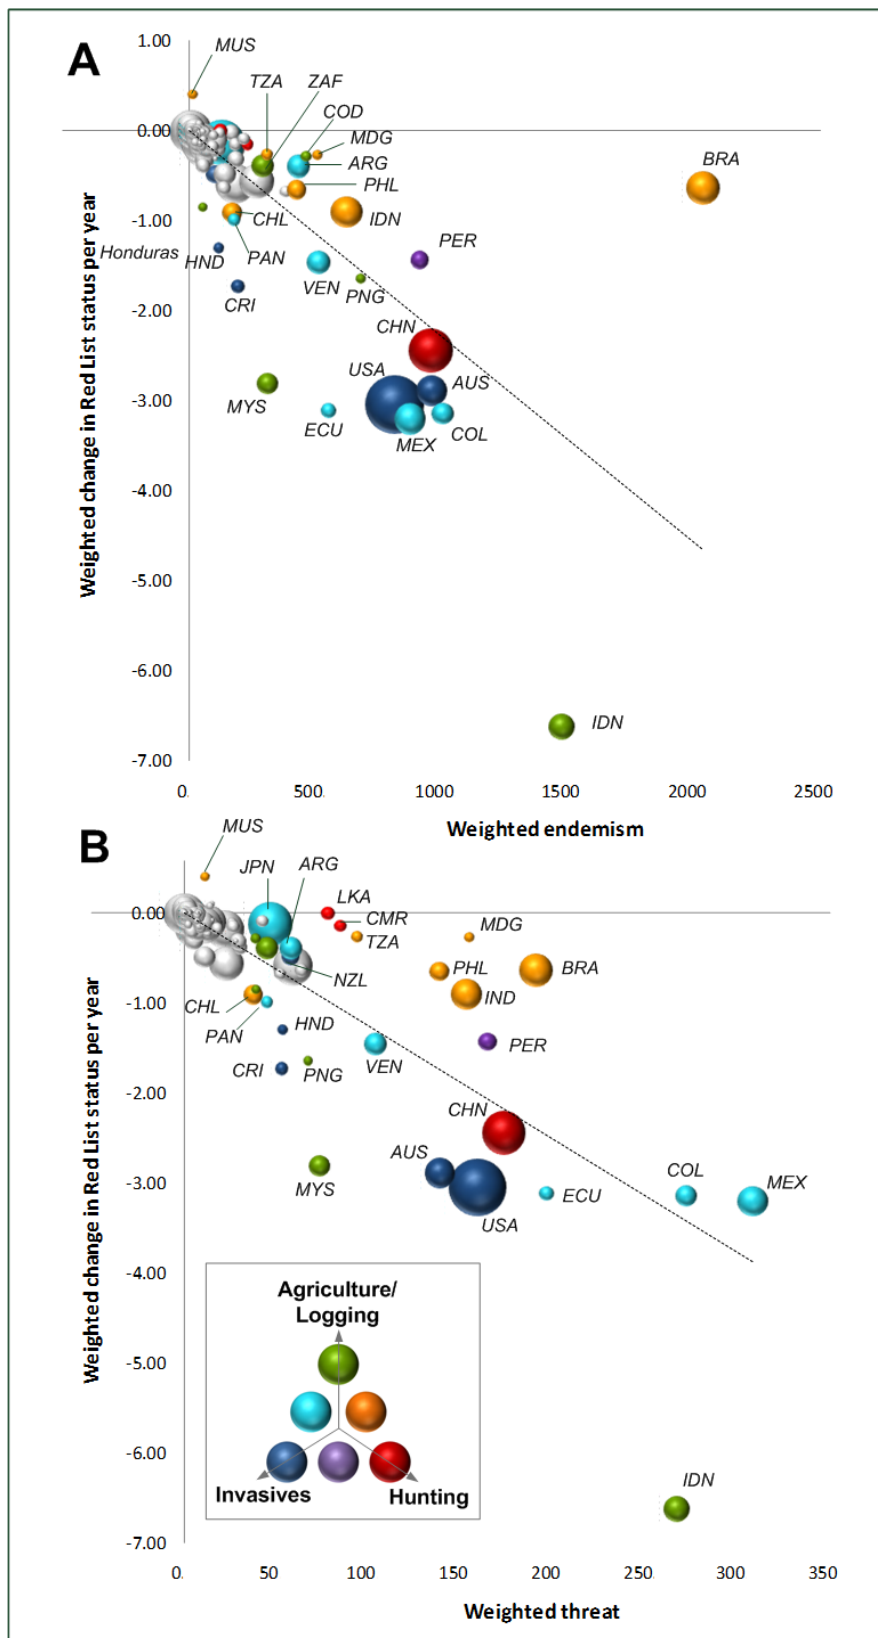

**Figure S5.** Relationship between each country's responsibility to conservation and its contribution to changes in the global conservation status of birds, mammals and amphibians. Responsibility measured by: (A) weighted endemism; (B) weighted threat. Dashed lines are the regression lines fitted through the origin: (A)  $R^2 = 0.57$ ; (B)  $R^2 = 0.70$  ( $n=195$ ;  $p<0.001$ ). Circle size is proportional to each country's Gross Domestic Product in 2009. Circle color indicates the main threat (or combination of threats) for selected countries. See Table S2 for country codes.
