# Supplementary material for: Spatially Explicit Trends in the Global Conservation Status of Vertebrates
Source: PLOS journal article supplement (doi:10.1371/journal.pone.0113934), 2014-11-26
Supplement: S1 (10.1371/journal.pone.0113934.s001) [file journal.pone.0113934.s001]

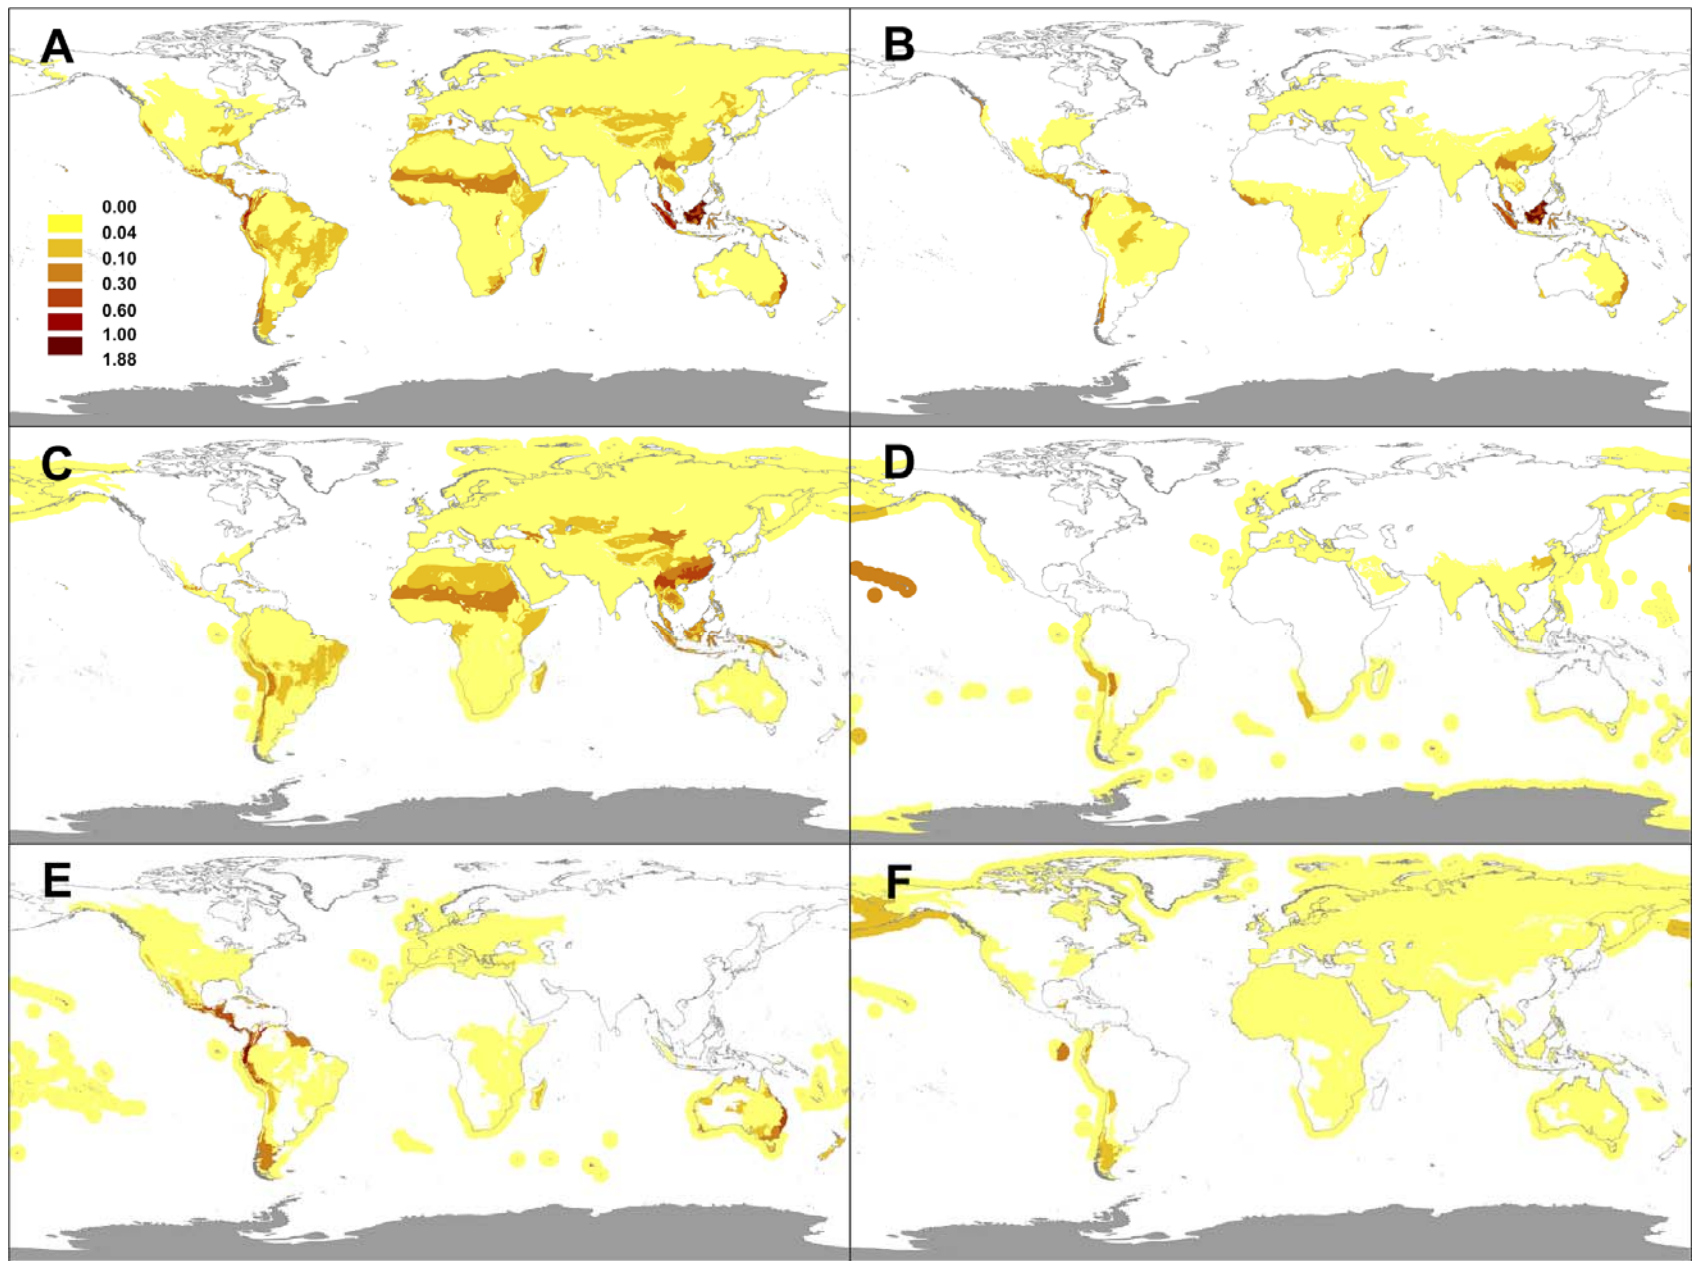

**Figure S4.** Weighted impact of each threat to the deterioration in global species conservation status, across ecoregions: (A) agriculture; (B) logging; (C) hunting and trapping; (D) fisheries; (E) invasives; and (F) climate change. The same color scale is used across panels, hence shades are directly comparable.
