# Supplementary material for: Spatially Explicit Trends in the Global Conservation Status of Vertebrates
Source: PLOS journal article supplement (doi:10.1371/journal.pone.0113934), 2014-11-26
Supplement: S1 (10.1371/journal.pone.0113934.s001) [file journal.pone.0113934.s001]

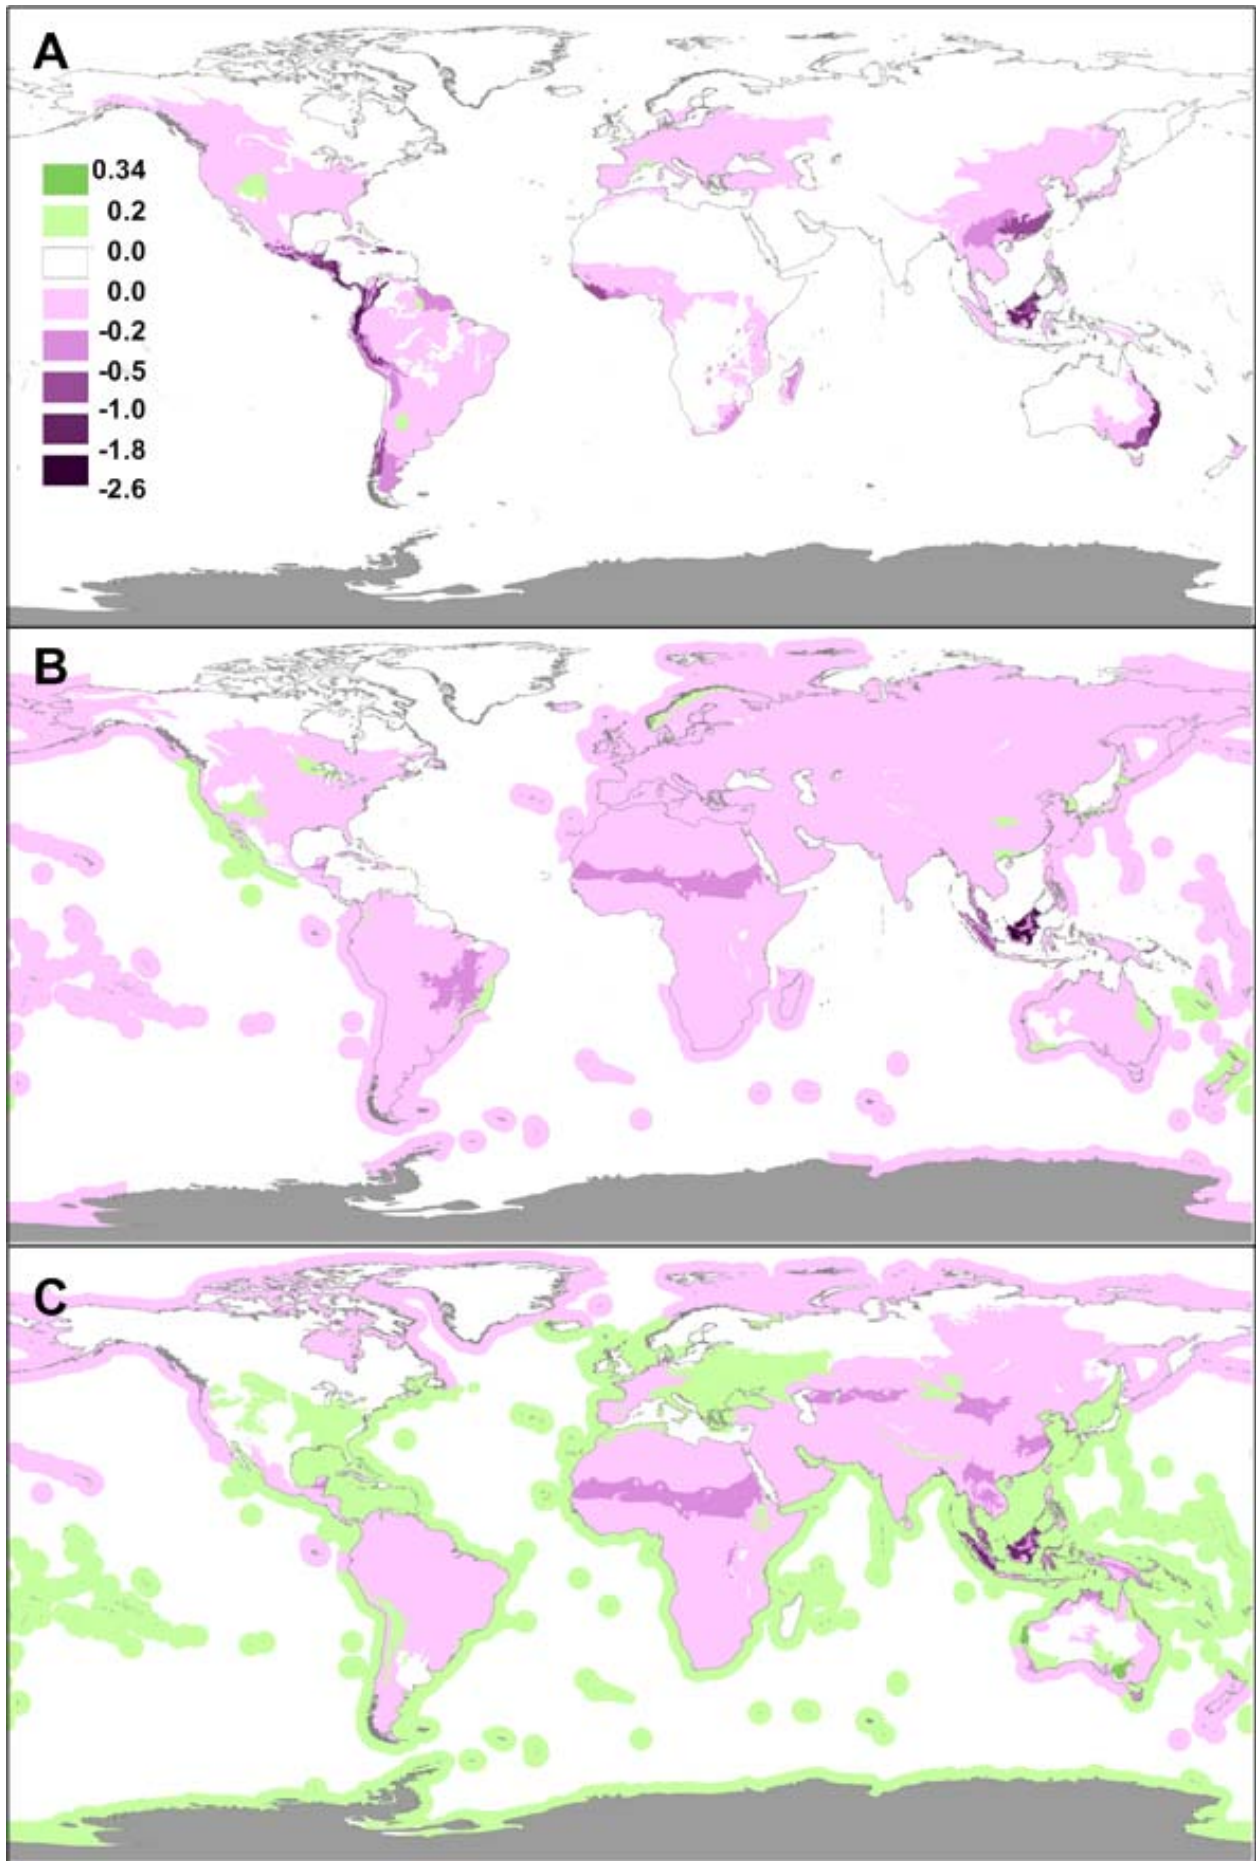

**Figure S2.** Variation across ecoregions in the weighted change in Red List status per year, for different taxonomic groups: (A) amphibians; (B) birds; (C) mammals. The same color scale is used across panels (and in Figure 1C) so shades are directly comparable.
