# Supplementary material for: Spatially Explicit Trends in the Global Conservation Status of Vertebrates
Source: PLOS journal article supplement (doi:10.1371/journal.pone.0113934), 2014-11-26
Supplement: S1 (10.1371/journal.pone.0113934.s001) [file journal.pone.0113934.s001]

## Spatially explicit trends in the global conservation status of vertebrates

Ana S. L. Rodrigues, Thomas M. Brooks, Stuart H.M. Butchart, Janice Chanson, Neil Cox, Michael Hoffmann, Simon N. Stuart

**Supplementary Table S2. Key results per country.** Countries include dependent territories. Values are calculated across the marine and land territory of each country combined (as in Figures 4 and S5, but unlike Figures 1-3 and S1-S4). Code: ISO 3166-1 country code. *E*: weighted endemism, a measure of each country's responsibility towards global species conservation (Equation 3; the sum across countries equals the total number of species in the group – amphibians, birds, mammals and all three taxa combined). *T*: weighted threat, a measure of the responsibility of each country towards the conservation of threatened species (Equation 4; the sum across countries equals the total number of threatened amphibians in the group). *W*: weighted Red List change per year, the net contribution of each country to the global change in species conservation status per year (Equation 11 the sum across countries is the net number of step changes per year in the group). GDP per capita: Gross Domestic Product based on purchasing-power-parity per capita, in 2009 (unit: current US dollars). GDP: Gross domestic product in 2009 (unit: current 1,000,000,000 US dollars). GEF5: allocations for biodiversity under the Global Environment Facility fifth replenishment (2010-2014), per country, under the System for Transparent Allocation of Resources (STAR) (unit: 1,000,000 US dollars). *H*, *I* and *AL*: relative importance of, respectively, hunting and trapping, invasive species, and agriculture and logging, to the deterioration in Red List status per country (see section 2.6). Threat code: code of the dominant threat (or combination of threats) responsible for the deterioration in Red List status in each country (used in Figures 4 and S5).

| COUNTRY                |      | Amphibians |          |          | Birds    |          |          | Mammals  |          |          | Combined |          |          | Economic data  |        |       | Threats |    |     |             |
|------------------------|------|------------|----------|----------|----------|----------|----------|----------|----------|----------|----------|----------|----------|----------------|--------|-------|---------|----|-----|-------------|
| Name                   | Code | <i>E</i>   | <i>T</i> | <i>W</i> | <i>E</i> | <i>T</i> | <i>W</i> | <i>E</i> | <i>T</i> | <i>W</i> | <i>E</i> | <i>T</i> | <i>W</i> | GDP per capita | GDP    | GEF5  | H       | I  | AL  | Threat code |
| Afghanistan            | AFG  | 1.78       | 1.00     | 0.00     | 14.05    | 0.15     | -0.01    | 10.48    | 0.52     | -0.01    | 26.32    | 1.67     | -0.02    | 935.0          | 10.6   | 3.35  | 66      | 0  | 34  | H           |
| Albania                | ALB  | 1.46       | 0.96     | -0.07    | 0.47     | 0.02     | 0.00     | 1.34     | 0.18     | 0.00     | 3.27     | 1.16     | -0.07    | 7163.8         | 12.3   | 1.5   | 50      | 50 | 0   | H-I         |
| Algeria                | DZA  | 3.59       | 1.50     | 0.00     | 15.74    | 1.22     | -0.03    | 15.85    | 2.03     | -0.04    | 35.18    | 4.75     | -0.07    | 6869.1         | 166.5  | 3.87  | 48      | 0  | 52  | H-AL        |
| Andorra                | AND  | 0.02       | 0.00     | 0.00     | 0.01     | 0.00     | 0.00     | 0.06     | 0.02     | 0.00     | 0.08     | 0.02     | 0.00     | -              | 3.2    | -     | 4       | 94 | 2   | I           |
| Angola                 | AGO  | 34.97      | 0.00     | 0.00     | 92.11    | 6.71     | -0.01    | 41.89    | 0.51     | -0.01    | 168.97   | 7.22     | -0.02    | 6116.5         | 84.9   | 6.99  | 70      | 2  | 28  | H           |
| Antigua and Barbuda    | ATG  | 0.15       | 0.00     | 0.00     | 1.61     | 0.03     | 0.00     | 0.25     | 0.00     | 0.00     | 2.01     | 0.03     | 0.00     | 17892.9        | 1.2    | 1.5   | 0       | 50 | 50  | I-AL        |
| Argentina              | ARG  | 75.42      | 25.78    | -0.23    | 212.52   | 13.71    | -0.12    | 148.10   | 18.44    | -0.05    | 436.04   | 57.93    | -0.39    | 14560.9        | 328.5  | 14.61 | 23      | 32 | 45  | I-AL        |
| Armenia                | ARM  | 0.05       | 0.00     | 0.00     | 0.57     | 0.01     | -0.01    | 3.98     | 2.31     | 0.00     | 4.60     | 2.32     | -0.01    | 4966.0         | 11.9   | 1.5   | 45      | 0  | 55  | H-AL        |
| Australia              | AUS  | 215.51     | 47.00    | -1.82    | 480.94   | 38.83    | -0.16    | 266.57   | 52.58    | -0.92    | 963.02   | 138.42   | -2.89    | 38910.8        | 1015.2 | -     | 0       | 78 | 22  | I           |
| Austria                | AUT  | 0.89       | 0.00     | 0.00     | 0.90     | 0.00     | 0.00     | 2.97     | 1.02     | 0.00     | 4.75     | 1.02     | 0.00     | 38838.9        | 413.5  | -     | 13      | 40 | 47  | I-AL        |
| Azerbaijan             | AZE  | 0.29       | 0.00     | 0.00     | 1.58     | 0.07     | 0.00     | 5.62     | 0.27     | 0.00     | 7.50     | 0.34     | -0.01    | 9563.9         | 46.1   | 1.5   | 48      | 2  | 50  | H-AL        |
| Bahrain                | BHR  | 0.00       | 0.00     | 0.00     | 0.02     | 0.01     | 0.00     | 0.01     | 0.00     | 0.00     | 0.03     | 0.01     | 0.00     | 27068.0        | 21.9   | -     | 0       | 0  | 100 | AL          |
| Bangladesh             | BGD  | 2.69       | 0.00     | 0.00     | 8.58     | 1.09     | -0.02    | 2.69     | 0.96     | -0.01    | 13.96    | 2.04     | -0.03    | 1465.0         | 79.6   | 1.88  | 36      | 0  | 64  | H-AL        |
| Barbados               | BRB  | 0.08       | 0.00     | 0.00     | 1.44     | 0.05     | 0.00     | 0.56     | 0.28     | 0.00     | 2.08     | 0.33     | 0.00     | 18130.6        | 3.7    | 1.5   | -       | -  | -   | -           |
| Belarus                | BRL  | 0.51       | 0.00     | 0.00     | 2.25     | 0.05     | 0.00     | 1.73     | 0.41     | 0.04     | 4.50     | 0.46     | 0.03     | 12737.1        | 60.3   | 1.5   | 48      | 7  | 44  | H-AL        |
| Belgium                | BEL  | 0.14       | 0.00     | 0.00     | 0.26     | 0.00     | 0.00     | 0.25     | 0.00     | 0.00     | 0.66     | 0.00     | 0.00     | 35421.6        | 504.2  | -     | 34      | 25 | 41  | H-AL        |
| Belize                 | BLZ  | 5.84       | 2.00     | -0.08    | 7.83     | 0.23     | 0.00     | 2.19     | 0.29     | 0.00     | 15.86    | 2.52     | -0.08    | 7718.5         | 1.4    | 2.44  | 0       | 68 | 32  | I           |
| Benin                  | BEN  | 1.01       | 0.00     | 0.00     | 5.30     | 0.05     | 0.00     | 3.89     | 0.29     | 0.00     | 10.20    | 0.34     | 0.00     | 1444.6         | 6.7    | 1.5   | 57      | 0  | 43  | H-AL        |
| Bhutan                 | BTN  | 1.09       | 0.08     | 0.00     | 12.86    | 1.05     | 0.00     | 4.13     | 1.87     | 0.00     | 18.08    | 3.00     | -0.01    | 5212.2         | 1.3    | 1.96  | 24      | 0  | 76  | AL          |
| Bolivia                | BOL  | 101.37     | 31.07    | -0.48    | 193.03   | 13.33    | -0.19    | 88.14    | 7.33     | -0.01    | 382.53   | 51.73    | -0.68    | 4455.0         | 16.7   | 11.44 | 45      | 21 | 35  | H-AL        |
| Bosnia and Herzegovina | BIH  | 0.53       | 0.29     | 0.00     | 0.57     | 0.00     | 0.00     | 1.35     | 0.36     | 0.00     | 2.45     | 0.65     | 0.00     | 7361.1         | 18.5   | 1.5   | 11      | 38 | 52  | I-AL        |
| Botswana               | BWA  | 2.78       | 0.00     | 0.00     | 29.33    | 0.52     | -0.01    | 13.04    | 0.91     | 0.00     | 45.15    | 1.42     | -0.01    | 13992.4        | 13.4   | 2.11  | 69      | 0  | 31  | H           |
| Brazil                 | BRA  | 677.22     | 27.36    | -0.23    | 938.85   | 96.79    | -0.28    | 416.67   | 66.42    | -0.14    | 2032.75  | 190.57   | -0.64    | 10513.8        | 1575.2 | 68.22 | 42      | 13 | 45  | H-AL        |
| Brunei Darussalam      | BRN  | 0.91       | 0.09     | -0.02    | 1.30     | 0.09     | -0.02    | 1.22     | 0.38     | -0.01    | 3.43     | 0.56     | -0.05    | 49109.9        | 11.5   | -     | 12      | 0  | 88  | AL          |

|                                         |            |        |        |       |        |       |       |        |       |       |         |        |       |         |        |       |    |    |    |      |
|-----------------------------------------|------------|--------|--------|-------|--------|-------|-------|--------|-------|-------|---------|--------|-------|---------|--------|-------|----|----|----|------|
| <b>Bulgaria</b>                         | <b>BGR</b> | 0.64   | 0.00   | 0.00  | 1.36   | 0.03  | 0.00  | 3.02   | 0.57  | 0.00  | 5.02    | 0.60   | 0.00  | 11900.3 | 49.9   | -     | 34 | 13 | 53 | H-AL |
| <b>Burkina Faso</b>                     | <b>BFA</b> | 1.75   | 0.00   | 0.00  | 9.82   | 0.16  | -0.01 | 5.83   | 0.11  | 0.00  | 17.40   | 0.27   | -0.01 | 1304.5  | 7.9    | 1.5   | 59 | 0  | 41 | H-AL |
| <b>Burundi</b>                          | <b>BDI</b> | 3.53   | 0.56   | 0.00  | 8.46   | 0.97  | -0.01 | 3.66   | 1.01  | 0.00  | 15.66   | 2.54   | -0.01 | 400.2   | 1.2    | 1.5   | 11 | 2  | 88 | AL   |
| <b>Cambodia</b>                         | <b>KHM</b> | 12.60  | 1.02   | -0.01 | 23.26  | 3.16  | -0.06 | 12.15  | 4.73  | -0.11 | 48.01   | 8.91   | -0.18 | 2015.0  | 10.4   | 3.85  | 56 | 0  | 44 | H-AL |
| <b>Cameroon</b>                         | <b>CMR</b> | 101.24 | 50.44  | -0.07 | 74.51  | 9.07  | -0.05 | 58.68  | 25.20 | -0.03 | 234.42  | 84.71  | -0.15 | 2146.9  | 23.4   | 10.31 | 68 | 13 | 20 | H    |
| <b>Canada</b>                           | <b>CAN</b> | 11.21  | 0.03   | -0.03 | 87.74  | 3.05  | -0.02 | 54.30  | 1.72  | -0.14 | 153.25  | 4.80   | -0.18 | 38025.3 | 1501.3 | -     | 0  | 49 | 51 | I-AL |
| <b>Cape Verde</b>                       | <b>CPV</b> | 0.00   | 0.00   | 0.00  | 6.19   | 2.00  | 0.00  | 0.38   | 0.03  | 0.00  | 6.57    | 2.03   | 0.00  | 3587.8  | 1.6    | 3.52  | 78 | 0  | 22 | H    |
| <b>Central African Republic</b>         | <b>CAF</b> | 7.75   | 0.00   | 0.00  | 29.29  | 0.10  | -0.01 | 19.09  | 0.23  | -0.01 | 56.12   | 0.33   | -0.02 | 745.0   | 2.0    | 1.68  | 61 | 12 | 28 | H-AL |
| <b>Chad</b>                             | <b>TCD</b> | 4.33   | 0.00   | 0.00  | 22.56  | 0.58  | -0.03 | 7.85   | 1.00  | -0.04 | 34.74   | 1.58   | -0.07 | 1611.7  | 8.4    | 1.91  | 60 | 0  | 40 | H-AL |
| <b>Chile</b>                            | <b>CHL</b> | 50.47  | 18.96  | -0.66 | 76.30  | 9.26  | -0.07 | 48.57  | 9.94  | -0.18 | 175.34  | 38.15  | -0.91 | 14340.9 | 169.5  | 18.09 | 30 | 20 | 50 | H-AL |
| <b>China</b>                            | <b>CHN</b> | 282.31 | 95.39  | -1.40 | 402.18 | 41.15 | -0.13 | 271.39 | 37.28 | -0.91 | 955.88  | 173.82 | -2.45 | 6567.0  | 4542.4 | 52.67 | 67 | 3  | 30 | H    |
| <b>Colombia</b>                         | <b>COL</b> | 470.13 | 186.56 | -2.69 | 412.44 | 62.33 | -0.19 | 122.56 | 23.61 | -0.26 | 1005.14 | 272.51 | -3.15 | 8936.4  | 243.8  | 37.49 | 2  | 60 | 38 | I-AL |
| <b>Comoros</b>                          | <b>COM</b> | 0.00   | 0.00   | 0.00  | 15.54  | 6.07  | 0.00  | 4.68   | 2.01  | 0.00  | 20.22   | 8.08   | 0.00  | 1159.6  | 0.5    | 2.08  | 27 | 16 | 57 | H-AL |
| <b>Cook Islands</b>                     | <b>COK</b> | 0.00   | 0.00   | 0.00  | 9.33   | 6.77  | 0.05  | 0.48   | 0.06  | 0.00  | 9.81    | 6.84   | 0.05  | -       | -      | 2.14  | -  | -  | -  | -    |
| <b>Costa Rica</b>                       | <b>CRI</b> | 92.69  | 41.52  | -1.73 | 76.20  | 9.18  | 0.00  | 21.74  | 1.82  | 0.00  | 190.63  | 52.53  | -1.73 | 10579.3 | 29.7   | 11.27 | 1  | 83 | 16 | I    |
| <b>Croatia</b>                          | <b>HRV</b> | 0.92   | 0.58   | 0.00  | 0.82   | 0.01  | 0.00  | 1.08   | 0.18  | 0.00  | 2.82    | 0.77   | 0.00  | 17703.3 | 69.3   | 1.5   | 6  | 32 | 62 | I-AL |
| <b>Cuba</b>                             | <b>CUB</b> | 60.66  | 48.79  | -0.08 | 39.21  | 11.88 | 0.00  | 23.21  | 12.12 | -0.08 | 123.08  | 72.79  | -0.16 | -       | -      | 11.52 | 33 | 42 | 25 | H-I  |
| <b>Cyprus</b>                           | <b>CYP</b> | 0.05   | 0.00   | 0.00  | 0.25   | 0.00  | 0.00  | 2.01   | 0.01  | 0.00  | 2.31    | 0.01   | 0.00  | 28544.1 | 24.9   | -     | 31 | 0  | 69 | AL   |
| <b>Czech Republic</b>                   | <b>CZE</b> | 0.45   | 0.00   | 0.00  | 0.71   | 0.00  | 0.00  | 0.81   | 0.07  | 0.00  | 1.96    | 0.07   | 0.00  | 24093.3 | 215.5  | -     | 36 | 24 | 40 | H-AL |
| <b>Democratic Republic of the Congo</b> | <b>COD</b> | 100.97 | 8.36   | 0.00  | 223.88 | 16.83 | -0.06 | 137.99 | 13.34 | -0.23 | 462.85  | 38.53  | -0.29 | 332.0   | 11.7   | 13.81 | 24 | 1  | 75 | AL   |
| <b>Denmark</b>                          | <b>DNK</b> | 0.08   | 0.00   | 0.00  | 5.30   | 0.01  | 0.00  | 3.61   | 0.69  | -0.02 | 8.99    | 0.71   | -0.02 | 35757.3 | 341.3  | -     | 64 | 5  | 31 | H-AL |
| <b>Djibouti</b>                         | <b>DJI</b> | 0.10   | 0.00   | 0.00  | 1.92   | 1.01  | -0.05 | 0.86   | 0.09  | 0.00  | 2.87    | 1.10   | -0.05 | 2484.0  | 0.9    | 1.5   | 1  | 0  | 99 | AL   |
| <b>Dominica</b>                         | <b>DMA</b> | 2.18   | 1.97   | -0.05 | 4.76   | 2.34  | -0.02 | 0.87   | 0.34  | 0.00  | 7.81    | 4.65   | -0.06 | 10176.9 | 0.4    | 1.5   | 19 | 49 | 32 | I-AL |
| <b>Dominican Republic</b>               | <b>DOM</b> | 24.53  | 20.50  | -0.37 | 26.12  | 7.43  | -0.02 | 5.66   | 2.48  | 0.00  | 56.31   | 30.41  | -0.39 | 8896.2  | 45.5   | 5.36  | 4  | 43 | 52 | I-AL |
| <b>East Timor</b>                       | <b>TMP</b> | 1.00   | 0.00   | 0.00  | 17.75  | 2.17  | -0.05 | 4.20   | 0.51  | 0.00  | 22.95   | 2.69   | -0.05 | 2521.7  | 0.5    | 1.5   | 30 | 0  | 70 | AL   |

|                          |            |        |        |       |        |       |       |        |        |       |         |        |       |         |        |       |    |    |    |       |
|--------------------------|------------|--------|--------|-------|--------|-------|-------|--------|--------|-------|---------|--------|-------|---------|--------|-------|----|----|----|-------|
| <b>Ecuador</b>           | <b>ECU</b> | 255.59 | 133.81 | -2.63 | 229.75 | 42.99 | -0.20 | 66.48  | 19.66  | -0.29 | 551.81  | 196.47 | -3.12 | 7880.7  | 54.7   | 24.37 | 4  | 58 | 38 | I-AL  |
| <b>Egypt</b>             | <b>EGY</b> | 1.25   | 0.00   | 0.00  | 6.51   | 0.63  | -0.03 | 12.39  | 1.33   | -0.01 | 20.14   | 1.97   | -0.04 | 6123.1  | 162.3  | 4.58  | 49 | 0  | 51 | H-AL  |
| <b>El Salvador</b>       | <b>SLV</b> | 4.13   | 1.61   | -0.02 | 4.97   | 0.05  | 0.00  | 3.12   | 0.03   | 0.00  | 12.22   | 1.69   | -0.02 | 7365.8  | 22.1   | 1.5   | 0  | 77 | 23 | I     |
| <b>Equatorial Guinea</b> | <b>GNQ</b> | 5.42   | 1.20   | -0.02 | 8.43   | 2.11  | 0.00  | 5.67   | 3.03   | 0.00  | 19.52   | 6.33   | -0.02 | 18599.6 | 18.5   | 1.5   | 83 | 13 | 5  | H     |
| <b>Eritrea</b>           | <b>ERI</b> | 0.33   | 0.00   | 0.00  | 7.07   | 0.11  | -0.01 | 2.59   | 0.50   | 0.00  | 10.00   | 0.61   | -0.01 | 679.9   | 1.7    | 1.5   | 64 | 0  | 36 | H-AL  |
| <b>Estonia</b>           | <b>EST</b> | 0.05   | 0.00   | 0.00  | 0.51   | 0.01  | 0.00  | 0.24   | 0.01   | 0.00  | 0.80    | 0.01   | 0.00  | 17908.2 | 23.4   | -     | 28 | 1  | 71 | AL    |
| <b>Ethiopia</b>          | <b>ETH</b> | 32.26  | 9.00   | 0.00  | 114.49 | 12.98 | -0.16 | 70.35  | 20.58  | 0.07  | 217.11  | 42.55  | -0.09 | 954.4   | 25.6   | 8.13  | 19 | 0  | 81 | AL    |
| <b>Fiji</b>              | <b>FJI</b> | 2.00   | 1.00   | 0.00  | 35.77  | 9.80  | 0.00  | 4.02   | 2.59   | 0.07  | 41.79   | 13.39  | 0.07  | 4358.6  | 3.6    | 4.56  | -  | -  | -  | -     |
| <b>Finland</b>           | <b>FIN</b> | 0.14   | 0.00   | 0.00  | 2.49   | 0.02  | 0.00  | 1.18   | 0.00   | 0.00  | 3.81    | 0.02   | 0.00  | 33555.9 | 272.7  | -     | 38 | 4  | 59 | H-AL  |
| <b>France</b>            | <b>FRA</b> | 28.15  | 5.38   | -0.20 | 120.66 | 41.29 | -0.37 | 34.16  | 12.00  | -0.02 | 182.97  | 58.66  | -0.60 | 33678.5 | 2856.6 | -     | 12 | 66 | 22 | I-AL  |
| <b>Gabon</b>             | <b>GAB</b> | 24.54  | 1.38   | 0.00  | 34.28  | 1.37  | 0.00  | 20.95  | 3.42   | -0.04 | 79.77   | 6.18   | -0.04 | 14317.6 | 14.5   | 3.4   | 36 | 46 | 18 | H-I   |
| <b>Gambia</b>            | <b>GMB</b> | 0.13   | 0.00   | 0.00  | 0.70   | 0.01  | 0.00  | 0.37   | 0.03   | 0.00  | 1.21    | 0.04   | 0.00  | 1438.5  | 0.8    | 1.5   | 41 | 0  | 59 | H-AL  |
| <b>Georgia</b>           | <b>GEO</b> | 1.61   | 0.23   | 0.00  | 1.64   | 0.02  | -0.02 | 6.01   | 1.03   | -0.04 | 9.27    | 1.27   | -0.05 | 4757.2  | 12.8   | 1.5   | 61 | 1  | 39 | H-AL  |
| <b>Germany</b>           | <b>DEU</b> | 1.70   | 0.00   | 0.00  | 3.31   | 0.01  | -0.01 | 3.27   | 0.01   | 0.00  | 8.28    | 0.02   | -0.01 | 34212.3 | 3649.5 | -     | 54 | 12 | 33 | H-AL  |
| <b>Ghana</b>             | <b>GHA</b> | 13.71  | 5.29   | -0.05 | 19.20  | 1.09  | 0.00  | 18.66  | 1.54   | -0.01 | 51.57   | 7.92   | -0.06 | 1550.8  | 16.7   | 2.62  | 20 | 0  | 80 | AL    |
| <b>Greece</b>            | <b>GRC</b> | 5.83   | 3.91   | 0.00  | 2.75   | 0.08  | -0.01 | 6.34   | 2.04   | 0.00  | 14.92   | 6.03   | 0.00  | 29881.5 | 355.9  | -     | 27 | 27 | 46 | Mixed |
| <b>Grenada</b>           | <b>GRD</b> | 1.09   | 1.00   | 0.00  | 3.41   | 1.00  | 0.00  | 0.06   | 0.00   | 0.00  | 4.56    | 2.00   | 0.00  | 10712.3 | 0.6    | 1.5   | -  | -  | -  | -     |
| <b>Guatemala</b>         | <b>GTM</b> | 76.71  | 55.27  | -0.60 | 43.25  | 3.11  | 0.00  | 20.60  | 4.82   | -0.03 | 140.56  | 63.20  | -0.64 | 4839.6  | 39.0   | 7.99  | 0  | 65 | 35 | I-AL  |
| <b>Guinea</b>            | <b>GIN</b> | 14.20  | 2.19   | -0.14 | 13.63  | 0.57  | 0.00  | 14.17  | 5.36   | -0.01 | 42.00   | 8.12   | -0.15 | 991.0   | 3.8    | 2.43  | 16 | 0  | 84 | AL    |
| <b>Guinea-Bissau</b>     | <b>GNB</b> | 0.84   | 0.00   | 0.00  | 1.79   | 0.03  | 0.00  | 1.34   | 0.35   | 0.00  | 3.97    | 0.38   | 0.00  | 1068.3  | 0.4    | 1.5   | 59 | 0  | 41 | H-AL  |
| <b>Guyana</b>            | <b>GUY</b> | 36.63  | 1.82   | -0.01 | 34.75  | 0.25  | 0.00  | 11.46  | 0.40   | 0.00  | 82.84   | 2.48   | -0.02 | 6688.0  | 1.2    | 3.26  | 12 | 55 | 33 | I-AL  |
| <b>Haiti</b>             | <b>HTI</b> | 36.47  | 35.50  | -0.84 | 18.39  | 2.53  | -0.01 | 2.23   | 0.50   | 0.00  | 57.09   | 38.53  | -0.85 | 1339.0  | 7.2    | 4.56  | 1  | 4  | 95 | AL    |
| <b>Honduras</b>          | <b>HND</b> | 60.59  | 49.23  | -1.30 | 42.34  | 2.67  | 0.00  | 13.32  | 1.31   | 0.00  | 116.24  | 53.22  | -1.30 | 4150.8  | 13.3   | 7.27  | 0  | 76 | 24 | I     |
| <b>Hungary</b>           | <b>HUN</b> | 0.61   | 0.00   | 0.00  | 0.89   | 0.03  | 0.00  | 1.18   | 0.17   | 0.00  | 2.69    | 0.20   | 0.00  | 18566.9 | 154.7  | -     | 28 | 25 | 46 | Mixed |
| <b>Iceland</b>           | <b>ISL</b> | 0.00   | 0.00   | 0.00  | 1.17   | 0.00  | 0.00  | 0.89   | 0.22   | 0.00  | 2.06    | 0.22   | 0.00  | 38022.5 | 16.7   | -     | 25 | 0  | 75 | AL    |
| <b>India</b>             | <b>IND</b> | 191.70 | 61.83  | -0.04 | 300.56 | 41.96 | -0.53 | 134.44 | 49.04  | -0.33 | 626.69  | 152.83 | -0.91 | 2940.7  | 1159.2 | 30.58 | 47 | 2  | 51 | H-AL  |
| <b>Indonesia</b>         | <b>IDN</b> | 238.08 | 24.18  | -0.60 | 811.97 | 94.98 | -2.64 | 427.47 | 147.49 | -3.39 | 1477.52 | 266.64 | -6.63 | 4156.7  | 510.7  | 54.17 | 32 | 1  | 67 | AL    |

|                      |            |        |       |       |       |       |       |        |       |       |        |        |       |         |        |       |    |    |    |      |
|----------------------|------------|--------|-------|-------|-------|-------|-------|--------|-------|-------|--------|--------|-------|---------|--------|-------|----|----|----|------|
| <b>Iran</b>          | <b>IRN</b> | 10.17  | 3.22  | -0.08 | 23.08 | 0.71  | -0.04 | 34.55  | 3.13  | -0.08 | 67.80  | 7.06   | -0.20 | 11172.2 | 286.1  | 6.33  | 65 | 0  | 35 | H-AL |
| <b>Iraq</b>          | <b>IRQ</b> | 0.53   | 0.32  | 0.00  | 4.32  | 0.51  | -0.02 | 4.20   | 1.08  | -0.01 | 9.06   | 1.91   | -0.03 | 3569.9  |        | 1.5   | 65 | 0  | 35 | H-AL |
| <b>Ireland</b>       | <b>IRL</b> | 0.02   | 0.00  | 0.00  | 0.99  | 0.09  | -0.01 | 0.62   | 0.07  | 0.00  | 1.63   | 0.15   | -0.01 | 39468.4 | 267.6  | -     | 25 | 0  | 75 | AL   |
| <b>Israel</b>        | <b>ISR</b> | 1.09   | 1.00  | 0.00  | 0.82  | 0.21  | -0.01 | 2.86   | 0.93  | 0.00  | 4.78   | 2.14   | -0.01 | 28392.9 | 202.1  | -     | 24 | 0  | 76 | AL   |
| <b>Italy</b>         | <b>ITA</b> | 23.19  | 7.86  | -0.12 | 4.72  | 0.14  | -0.02 | 14.61  | 2.16  | 0.00  | 42.52  | 10.16  | -0.14 | 29109.5 | 2303.1 | -     | 3  | 13 | 84 | AL   |
| <b>Ivory Coast</b>   | <b>CIV</b> | 24.13  | 7.82  | -0.17 | 34.99 | 4.03  | 0.00  | 30.48  | 5.92  | -0.01 | 89.60  | 17.77  | -0.18 | 1674.2  | 23.4   | 3.25  | 10 | 0  | 90 | AL   |
| <b>Jamaica</b>       | <b>JAM</b> | 21.00  | 17.00 | -0.13 | 10.57 | 5.37  | 0.01  | 5.61   | 3.03  | 0.00  | 37.19  | 25.40  | -0.11 | 8777.0  | 14.6   | 4.8   | 0  | 67 | 33 | I    |
| <b>Japan</b>         | <b>JPN</b> | 45.82  | 19.00 | 0.00  | 35.47 | 10.62 | -0.05 | 51.66  | 16.63 | -0.08 | 132.95 | 46.25  | -0.13 | 32607.9 | 4910.8 | -     | 8  | 31 | 62 | I-AL |
| <b>Jordan</b>        | <b>JOR</b> | 0.08   | 0.00  | 0.00  | 1.32  | 0.14  | -0.01 | 0.80   | 0.04  | 0.00  | 2.21   | 0.18   | -0.01 | 5620.0  | 21.2   | 1.5   | 26 | 0  | 74 | AL   |
| <b>Kazakhstan</b>    | <b>KAZ</b> | 1.56   | 0.69  | 0.00  | 29.00 | 2.01  | -0.08 | 32.74  | 2.10  | -0.23 | 63.30  | 4.80   | -0.31 | 11693.4 | 133.4  | 4.76  | 54 | 0  | 46 | H-AL |
| <b>Kenya</b>         | <b>KEN</b> | 27.04  | 5.90  | -0.04 | 96.32 | 9.17  | -0.07 | 56.66  | 11.16 | -0.04 | 180.02 | 26.23  | -0.15 | 1729.6  | 30.4   | 8.95  | 34 | 1  | 65 | H-AL |
| <b>Kiribati</b>      | <b>KIR</b> | 0.00   | 0.00  | 0.00  | 6.04  | 2.86  | 0.00  | 0.84   | 0.11  | 0.01  | 6.89   | 2.97   | 0.00  | 6048.6  | 0.1    | 1.69  | 25 | 0  | 75 | AL   |
| <b>Kuwait</b>        | <b>KWT</b> | 0.00   | 0.00  | 0.00  | 0.24  | 0.06  | 0.00  | 0.07   | 0.01  | 0.00  | 0.31   | 0.07   | 0.00  | 38304.0 | 148.0  | -     | 55 | 0  | 45 | H-AL |
| <b>Kyrgyzstan</b>    | <b>KGZ</b> | 1.23   | 0.00  | 0.00  | 4.90  | 0.09  | -0.01 | 6.02   | 0.16  | -0.02 | 12.16  | 0.24   | -0.02 | 2253.5  | 5.1    | 1.5   | 27 | 0  | 73 | AL   |
| <b>Laos</b>          | <b>LAO</b> | 20.18  | 1.50  | -0.01 | 45.55 | 1.55  | -0.03 | 32.52  | 9.73  | -0.20 | 98.25  | 12.79  | -0.23 | 2266.0  | 5.5    | 6.11  | 67 | 0  | 33 | H    |
| <b>Latvia</b>        | <b>LVA</b> | 0.14   | 0.00  | 0.00  | 0.64  | 0.00  | 0.00  | 0.37   | 0.00  | 0.00  | 1.14   | 0.00   | 0.00  | 14254.6 | 33.8   | -     | 37 | 2  | 60 | H-AL |
| <b>Lebanon</b>       | <b>LBN</b> | 0.29   | 0.00  | 0.00  | 0.36  | 0.21  | -0.01 | 0.25   | 0.01  | 0.00  | 0.90   | 0.22   | -0.01 | 14225.9 | 29.3   | 1.5   | 3  | 0  | 97 | AL   |
| <b>Lesotho</b>       | <b>LSO</b> | 3.09   | 0.00  | 0.00  | 3.23  | 0.19  | 0.00  | 2.42   | 0.06  | 0.00  | 8.75   | 0.25   | 0.00  | 1218.3  | 1.6    | 1.5   | 67 | 4  | 29 | H    |
| <b>Liberia</b>       | <b>LBR</b> | 14.70  | 1.70  | -0.13 | 16.31 | 3.94  | 0.00  | 15.94  | 5.08  | 0.00  | 46.95  | 10.72  | -0.14 | 424.3   | 0.8    | 2.42  | 4  | 0  | 96 | AL   |
| <b>Libya</b>         | <b>LBY</b> | 0.41   | 0.00  | 0.00  | 5.15  | 0.25  | -0.02 | 10.13  | 0.87  | -0.01 | 15.69  | 1.12   | -0.03 | 14328.1 | 93.2   | -     | 74 | 0  | 26 | H    |
| <b>Liechtenstein</b> | <b>LIE</b> | 0.00   | 0.00  | 0.00  | 0.00  | 0.00  | 0.00  | 0.00   | 0.00  | 0.00  | 0.01   | 0.00   | 0.00  | -       | 4.2    | 1.5   | 11 | 28 | 61 | I-AL |
| <b>Lithuania</b>     | <b>LTU</b> | 0.17   | 0.00  | 0.00  | 0.71  | 0.01  | 0.00  | 0.38   | 0.00  | 0.00  | 1.26   | 0.01   | 0.00  | 16542.3 | 47.3   | -     | 49 | 3  | 49 | H-AL |
| <b>Luxembourg</b>    | <b>LUX</b> | 0.02   | 0.00  | 0.00  | 0.02  | 0.00  | 0.00  | 0.03   | 0.00  | 0.00  | 0.06   | 0.00   | 0.00  | 78395.2 | 53.7   | -     | 56 | 12 | 32 | H-AL |
| <b>Madagascar</b>    | <b>MDG</b> | 238.07 | 67.00 | -0.17 | 84.63 | 29.51 | -0.11 | 184.88 | 58.06 | 0.00  | 507.58 | 154.57 | -0.27 | 932.4   | 9.5    | 26.06 | 40 | 20 | 39 | H-AL |
| <b>Malawi</b>        | <b>MWI</b> | 10.52  | 4.84  | 0.00  | 15.80 | 2.04  | -0.04 | 8.86   | 0.07  | 0.00  | 35.18  | 6.95   | -0.04 | 884.7   | 4.3    | 4.39  | 8  | 1  | 91 | AL   |
| <b>Malaysia</b>      | <b>MYS</b> | 131.60 | 41.73 | -0.89 | 88.98 | 8.28  | -0.90 | 90.43  | 23.91 | -1.03 | 311.01 | 73.92  | -2.82 | 13769.3 | 221.8  | 14.66 | 13 | 0  | 87 | AL   |
| <b>Maldives</b>      | <b>MDV</b> | 0.00   | 0.00  | 0.00  | 0.72  | 0.00  | 0.00  | 0.23   | 0.02  | 0.00  | 0.94   | 0.02   | 0.00  | 4894.0  | 1.3    | 2.54  | 25 | 0  | 75 | AL   |
| <b>Mali</b>          | <b>MLI</b> | 3.21   | 0.00  | 0.00  | 22.94 | 0.34  | -0.02 | 12.86  | 0.54  | -0.03 | 39.01  | 0.88   | -0.04 | 1173.0  | 8.7    | 1.96  | 63 | 0  | 37 | H-AL |

|                         |            |        |        |       |        |       |       |        |       |       |        |        |       |         |        |       |    |    |    |      |
|-------------------------|------------|--------|--------|-------|--------|-------|-------|--------|-------|-------|--------|--------|-------|---------|--------|-------|----|----|----|------|
| <b>Malta</b>            | <b>MLT</b> | 0.00   | 0.00   | 0.00  | 0.08   | 0.01  | 0.00  | 0.02   | 0.00  | 0.00  | 0.10   | 0.01   | 0.00  | 23584.0 | 7.4    | -     | -  | -  | -  | -    |
| <b>Marshall Islands</b> | <b>MHL</b> | 0.00   | 0.00   | 0.00  | 1.96   | 0.65  | 0.00  | 0.49   | 0.06  | 0.00  | 2.45   | 0.72   | 0.00  | -       | 0.2    | 2.02  | 25 | 0  | 75 | AL   |
| <b>Mauritania</b>       | <b>MRT</b> | 0.23   | 0.00   | 0.00  | 7.31   | 0.07  | -0.01 | 6.90   | 0.51  | -0.02 | 14.45  | 0.58   | -0.03 | 2037.4  | 2.9    | 2.05  | 66 | 0  | 34 | H    |
| <b>Mauritius</b>        | <b>MUS</b> | 0.00   | 0.00   | 0.00  | 10.29  | 9.51  | 0.40  | 2.70   | 2.42  | 0.00  | 12.98  | 11.92  | 0.40  | 12526.7 | 9.3    | 5.19  | 44 | 11 | 45 | H-AL |
| <b>Mexico</b>           | <b>MEX</b> | 292.93 | 188.40 | -2.68 | 333.68 | 31.55 | -0.07 | 251.07 | 88.40 | -0.46 | 877.68 | 308.35 | -3.21 | 13628.1 | 1088.1 | 52.75 | 11 | 57 | 32 | I-AL |
| <b>Micronesia</b>       | <b>FSM</b> | 0.00   | 0.00   | 0.00  | 18.66  | 4.14  | 0.00  | 5.06   | 3.28  | 0.01  | 23.72  | 7.42   | 0.01  | -       | 0.3    | 3.49  | 25 | 0  | 75 | AL   |
| <b>Moldova</b>          | <b>MDA</b> | 0.09   | 0.00   | 0.00  | 0.37   | 0.01  | 0.00  | 0.40   | 0.02  | 0.00  | 0.86   | 0.03   | 0.00  | 2842.6  | 6.0    | 1.5   | 55 | 9  | 36 | H-AL |
| <b>Monaco</b>           | <b>MCO</b> | 0.00   | 0.00   | 0.00  | 0.00   | 0.00  | 0.00  | 0.00   | 0.00  | 0.00  | 0.00   | 0.00   | 0.00  | -       | -      | -     | 75 | 0  | 25 | H    |
| <b>Mongolia</b>         | <b>MNG</b> | 0.26   | 0.00   | 0.00  | 18.69  | 2.31  | -0.06 | 23.02  | 3.78  | -0.09 | 41.97  | 6.09   | -0.15 | 3481.1  | 5.3    | 4.33  | 64 | 2  | 33 | H-AL |
| <b>Montenegro</b>       | <b>MNE</b> | 0.27   | 0.13   | -0.01 | 0.19   | 0.00  | 0.00  | 1.97   | 0.30  | 0.00  | 2.44   | 0.43   | -0.01 | 10393.2 | 4.9    | 1.5   | 49 | 49 | 1  | H-I  |
| <b>Morocco</b>          | <b>MAR</b> | 6.00   | 1.50   | -0.04 | 10.50  | 0.49  | -0.02 | 15.05  | 4.18  | -0.09 | 31.55  | 6.17   | -0.15 | 4604.2  | 88.9   | 4.9   | 14 | 23 | 63 | I-AL |
| <b>Mozambique</b>       | <b>MOZ</b> | 17.83  | 0.95   | 0.00  | 51.17  | 2.63  | -0.05 | 24.89  | 1.62  | 0.00  | 93.89  | 5.20   | -0.06 | 933.8   | 9.8    | 7     | 27 | 5  | 68 | AL   |
| <b>Myanmar</b>          | <b>MMR</b> | 28.09  | 0.06   | -0.01 | 118.73 | 7.23  | -0.11 | 47.35  | 9.60  | -0.20 | 194.17 | 16.89  | -0.33 | 1197.3  |        | 6.72  | 47 | 0  | 53 | H-AL |
| <b>Namibia</b>          | <b>NAM</b> | 8.99   | 0.72   | 0.00  | 55.41  | 2.85  | -0.06 | 28.36  | 1.63  | 0.00  | 92.75  | 5.21   | -0.06 | 6614.0  | 8.8    | 6.28  | 83 | 0  | 17 | H    |
| <b>Nauru</b>            | <b>NRU</b> | 0.00   | 0.00   | 0.00  | 1.24   | 1.05  | 0.00  | 0.08   | 0.01  | 0.00  | 1.32   | 1.06   | 0.00  | -       |        | 1.5   | -  | -  | -  | -    |
| <b>Nepal</b>            | <b>NPL</b> | 18.65  | 2.49   | 0.00  | 32.08  | 2.03  | -0.06 | 13.65  | 3.87  | 0.03  | 64.38  | 8.38   | -0.02 | 1205.3  | 12.6   | 2.67  | 11 | 0  | 89 | AL   |
| <b>Netherlands</b>      | <b>NLD</b> | 0.12   | 0.00   | 0.00  | 0.80   | 0.05  | 0.00  | 0.39   | 0.03  | 0.00  | 1.32   | 0.09   | 0.00  | 39937.9 | 871.0  | -     | 20 | 30 | 50 | I-AL |
| <b>New Zealand</b>      | <b>NZL</b> | 4.00   | 4.00   | -0.18 | 83.63  | 49.08 | -0.16 | 10.00  | 4.93  | -0.14 | 97.63  | 58.01  | -0.49 | 26707.8 | 129.9  | -     | 0  | 92 | 8  | I    |
| <b>Nicaragua</b>        | <b>NIC</b> | 19.91  | 4.99   | -0.13 | 41.35  | 1.66  | 0.00  | 14.87  | 0.30  | 0.00  | 76.13  | 6.95   | -0.13 | 2626.9  | 6.6    | 3.94  | 0  | 67 | 33 | I    |
| <b>Niger</b>            | <b>NER</b> | 0.61   | 0.00   | 0.00  | 13.59  | 0.22  | -0.02 | 8.18   | 1.64  | -0.11 | 22.39  | 1.86   | -0.13 | 719.1   | 5.4    | 1.5   | 61 | 0  | 39 | H-AL |
| <b>Nigeria</b>          | <b>NGA</b> | 11.05  | 2.15   | -0.01 | 60.57  | 2.81  | -0.01 | 36.04  | 5.84  | -0.09 | 107.66 | 10.79  | -0.11 | 2249.0  | 207.1  | 5.64  | 12 | 0  | 88 | AL   |
| <b>Niue</b>             | <b>NIU</b> | 0.00   | 0.00   | 0.00  | 0.51   | 0.14  | 0.00  | 0.08   | 0.01  | 0.00  | 0.59   | 0.15   | 0.00  | -       |        | 1.5   | 25 | 0  | 75 | AL   |
| <b>North Korea</b>      | <b>PRK</b> | 2.46   | 0.65   | -0.03 | 3.30   | 0.31  | 0.00  | 2.87   | 0.41  | -0.01 | 8.64   | 1.37   | -0.03 | -       |        | 1.5   | 25 | 1  | 75 | AL   |
| <b>Norway</b>           | <b>NOR</b> | 0.09   | 0.00   | 0.00  | 5.59   | 0.32  | -0.01 | 4.36   | 0.54  | -0.01 | 10.04  | 0.86   | -0.02 | 52561.3 | 451.8  | -     | 33 | 17 | 50 | H-AL |
| <b>Oman</b>             | <b>OMN</b> | 0.59   | 0.00   | 0.00  | 3.82   | 0.24  | 0.00  | 5.22   | 1.86  | 0.00  | 9.63   | 2.10   | -0.01 | 25109.8 | 41.6   | -     | 52 | 0  | 48 | H-AL |
| <b>Pakistan</b>         | <b>PAK</b> | 3.53   | 0.00   | 0.00  | 25.77  | 1.57  | -0.04 | 13.06  | 2.18  | -0.01 | 42.36  | 3.75   | -0.05 | 2661.0  | 164.5  | 4.92  | 68 | 0  | 32 | H    |
| <b>Palau</b>            | <b>PLW</b> | 1.00   | 0.00   | 0.00  | 12.20  | 0.32  | 0.00  | 1.41   | 0.24  | 0.00  | 14.61  | 0.56   | 0.00  | -       | 0.2    | 1.92  | 25 | 0  | 75 | AL   |
| <b>Panama</b>           | <b>PAN</b> | 79.53  | 31.77  | -0.99 | 67.73  | 8.14  | 0.00  | 26.68  | 5.27  | 0.00  | 173.93 | 45.18  | -0.99 | 11788.1 | 23.1   | 11.29 | 0  | 66 | 34 | I-AL |

|                                         |            |        |       |       |        |       |       |        |       |       |        |        |       |         |        |       |    |    |     |      |
|-----------------------------------------|------------|--------|-------|-------|--------|-------|-------|--------|-------|-------|--------|--------|-------|---------|--------|-------|----|----|-----|------|
| <b>Papua New Guinea</b>                 | <b>PNG</b> | 227.68 | 9.76  | -0.17 | 297.72 | 25.17 | -0.48 | 153.98 | 32.46 | -1.00 | 679.37 | 67.39  | -1.65 | 2166.7  | 8.2    | 13.32 | 32 | 2  | 67  | AL   |
| <b>Paraguay</b>                         | <b>PRY</b> | 9.63   | 0.00  | -0.01 | 38.69  | 1.92  | -0.01 | 17.07  | 1.66  | -0.01 | 65.39  | 3.58   | -0.03 | 4533.1  | 16.0   | 2.95  | 81 | 0  | 19  | H    |
| <b>Peru</b>                             | <b>PER</b> | 302.12 | 80.86 | -1.15 | 471.71 | 54.96 | -0.20 | 140.23 | 28.85 | -0.09 | 914.05 | 164.68 | -1.43 | 8638.4  | 129.1  | 26.25 | 28 | 52 | 19  | H-I  |
| <b>Philippines</b>                      | <b>PHL</b> | 81.11  | 48.00 | -0.14 | 225.46 | 62.55 | -0.17 | 123.22 | 27.64 | -0.34 | 429.78 | 138.19 | -0.65 | 3520.6  | 166.9  | 25.96 | 54 | 1  | 46  | H-AL |
| <b>Poland</b>                           | <b>POL</b> | 1.14   | 0.00  | 0.00  | 3.06   | 0.04  | 0.00  | 2.99   | 0.59  | 0.05  | 7.19   | 0.63   | 0.04  | 18072.4 | 527.9  | -     | 45 | 16 | 38  | H-AL |
| <b>Portugal</b>                         | <b>PRT</b> | 2.79   | 0.34  | -0.04 | 8.17   | 2.96  | 0.04  | 4.95   | 1.83  | -0.01 | 15.91  | 5.13   | -0.01 | 21858.7 | 243.5  | -     | 15 | 37 | 48  | I-AL |
| <b>Qatar</b>                            | <b>QAT</b> | 0.00   | 0.00  | 0.00  | 0.19   | 0.05  | 0.00  | 0.05   | 0.01  | 0.00  | 0.24   | 0.06   | 0.00  | 83840.7 | 71.0   | -     | 70 | 0  | 30  | H    |
| <b>Republique du Congo</b>              | <b>COG</b> | 11.51  | 0.00  | 0.00  | 31.82  | 0.20  | 0.00  | 25.86  | 1.50  | -0.04 | 69.19  | 1.70   | -0.04 | 4145.5  | 10.7   | 3.28  | 39 | 43 | 18  | H-I  |
| <b>Romania</b>                          | <b>ROU</b> | 1.41   | 0.00  | 0.00  | 2.18   | 0.04  | 0.00  | 4.51   | 0.27  | 0.00  | 8.09   | 0.30   | 0.00  | 11917.3 | 200.1  | -     | 45 | 15 | 40  | H-AL |
| <b>Russia</b>                           | <b>RUS</b> | 8.84   | 0.00  | 0.00  | 155.38 | 13.99 | -0.40 | 103.66 | 8.68  | -0.17 | 267.88 | 22.68  | -0.57 | 14920.0 | 1679.5 | 24.37 | 54 | 6  | 40  | H-AL |
| <b>Rwanda</b>                           | <b>RWA</b> | 7.79   | 3.20  | 0.00  | 11.05  | 1.13  | -0.01 | 8.42   | 3.77  | 0.00  | 27.26  | 8.10   | -0.01 | 1149.9  | 4.5    | 1.5   | 13 | 1  | 85  | AL   |
| <b>Saint Kitts and Nevis</b>            | <b>KNA</b> | 0.05   | 0.00  | 0.00  | 0.48   | 0.00  | 0.00  | 0.11   | 0.00  | 0.00  | 0.64   | 0.01   | 0.00  | 13429.2 | 0.5    | 1.5   | 25 | 0  | 75  | AL   |
| <b>Saint Lucia</b>                      | <b>LCA</b> | 0.11   | 0.00  | -0.01 | 6.69   | 3.34  | -0.01 | 0.29   | 0.00  | 0.00  | 7.10   | 3.34   | -0.01 | 10177.7 | 1.0    | 1.87  | 18 | 36 | 46  | I-AL |
| <b>Saint Vincent and the Grenadines</b> | <b>VCT</b> | 1.08   | 1.00  | 0.00  | 2.69   | 2.01  | 0.00  | 0.18   | 0.00  | 0.00  | 3.95   | 3.01   | 0.00  | 9976.5  | 0.6    | 1.5   | -  | -  | -   | -    |
| <b>Samoa</b>                            | <b>WSM</b> | 0.00   | 0.00  | 0.00  | 13.04  | 5.07  | -0.10 | 0.22   | 0.00  | 0.01  | 13.26  | 5.08   | -0.09 | 5782.1  | 0.5    | 2.43  | 0  | 40 | 60  | I-AL |
| <b>San Marino</b>                       | <b>SMR</b> | 0.00   | 0.00  | 0.00  | 0.00   | 0.00  | 0.00  | 0.00   | 0.00  | 0.00  | 0.00   | 0.00   | 0.00  | -       | 1.7    | -     | -  | -  | -   | -    |
| <b>Sao Tome and Principe</b>            | <b>STP</b> | 7.00   | 3.00  | -0.08 | 24.07  | 9.00  | 0.00  | 5.07   | 3.01  | 0.00  | 36.14  | 15.01  | -0.08 | 1814.1  | 0.2    | 2.77  | 0  | 0  | 100 | AL   |
| <b>Saudi Arabia</b>                     | <b>SAU</b> | 1.36   | 0.00  | 0.00  | 18.12  | 2.22  | -0.02 | 10.60  | 1.49  | -0.03 | 30.08  | 3.71   | -0.05 | 23221.4 | 468.8  | -     | 64 | 0  | 36  | H-AL |
| <b>Senegal</b>                          | <b>SEN</b> | 1.15   | 0.00  | 0.00  | 8.09   | 0.19  | -0.01 | 6.49   | 0.31  | -0.08 | 15.73  | 0.50   | -0.08 | 1743.1  | 13.3   | 1.8   | 66 | 0  | 34  | H-AL |
| <b>Serbia</b>                           | <b>SRB</b> | 0.73   | 0.00  | 0.00  | 1.03   | 0.00  | 0.00  | 1.46   | 0.14  | 0.00  | 3.22   | 0.15   | 0.00  | 10635.4 | 50.1   | 1.5   | 24 | 22 | 55  | H-AL |
| <b>Seychelles</b>                       | <b>SYC</b> | 11.00  | 6.00  | 0.00  | 12.88  | 7.01  | 0.10  | 2.45   | 2.07  | 0.00  | 26.33  | 15.07  | 0.10  | 20411.0 | 0.8    | 4.9   | 27 | 13 | 61  | H-AL |
| <b>Sierra Leone</b>                     | <b>SLE</b> | 7.89   | 1.18  | -0.04 | 8.54   | 0.51  | 0.00  | 6.33   | 1.45  | 0.00  | 22.77  | 3.14   | -0.05 | 759.2   | 2.0    | 1.5   | 11 | 0  | 89  | AL   |
| <b>Singapore</b>                        | <b>SGP</b> | 1.06   | 0.00  | 0.00  | 0.08   | 0.01  | 0.00  | 1.03   | 0.01  | 0.00  | 2.18   | 0.02   | 0.00  | 50522.7 | 181.9  | -     | 20 | 0  | 80  | AL   |
| <b>Slovakia</b>                         | <b>SVK</b> | 0.45   | 0.00  | 0.00  | 0.46   | 0.00  | 0.00  | 1.02   | 0.08  | 0.00  | 1.93   | 0.08   | 0.00  | 21244.9 | 98.5   | -     | 38 | 21 | 41  | H-AL |
| <b>Slovenia</b>                         | <b>SVN</b> | 0.38   | 0.19  | 0.00  | 0.22   | 0.00  | 0.00  | 0.72   | 0.01  | 0.00  | 1.32   | 0.20   | 0.00  | 27654.3 | 54.6   | -     | 0  | 34 | 66  | I-AL |

|                                                  |            |        |       |       |        |       |       |       |       |       |        |       |       |         |        |       |    |    |    |       |
|--------------------------------------------------|------------|--------|-------|-------|--------|-------|-------|-------|-------|-------|--------|-------|-------|---------|--------|-------|----|----|----|-------|
| <b>Solomon Islands</b>                           | <b>SLB</b> | 9.53   | 1.24  | 0.00  | 68.67  | 12.21 | -0.02 | 25.93 | 14.66 | -0.29 | 104.13 | 28.10 | -0.31 | 2818.7  | 0.6    | 3.6   | 14 | 0  | 86 | AL    |
| <b>Somalia</b>                                   | <b>SOM</b> | 7.98   | 0.00  | 0.00  | 48.60  | 3.25  | -0.01 | 27.03 | 2.60  | -0.08 | 83.61  | 5.84  | -0.09 | -       | -      | -     | 67 | 0  | 33 | H     |
| <b>South Africa</b>                              | <b>ZAF</b> | 68.56  | 19.28 | -0.25 | 137.44 | 13.13 | -0.14 | 83.58 | 12.74 | 0.00  | 289.58 | 45.15 | -0.40 | 10243.6 | 276.4  | 21.68 | 3  | 19 | 78 | AL    |
| <b>South Korea</b>                               | <b>KOR</b> | 7.05   | 1.35  | -0.02 | 4.86   | 1.13  | 0.00  | 2.49  | 0.30  | -0.01 | 14.39  | 2.78  | -0.03 | 27977.9 | 929.1  | -     | 37 | 0  | 63 | H-AL  |
| <b>Spain</b>                                     | <b>ESP</b> | 14.85  | 4.65  | -0.05 | 17.36  | 3.40  | -0.04 | 17.18 | 6.03  | -0.01 | 49.39  | 14.08 | -0.10 | 29689.3 | 1604.2 | -     | 19 | 33 | 47 | I-AL  |
| <b>Sri Lanka</b>                                 | <b>LKA</b> | 69.42  | 52.61 | 0.00  | 32.48  | 8.23  | 0.00  | 22.90 | 17.22 | -0.01 | 124.80 | 78.06 | -0.01 | 4768.5  | 40.6   | 7.84  | 73 | 0  | 27 | H     |
| <b>Sudan</b>                                     | <b>SDN</b> | 3.37   | 0.00  | 0.00  | 70.81  | 1.76  | -0.11 | 36.60 | 1.77  | -0.10 | 110.77 | 3.53  | -0.21 | 2380.3  | 55.9   | 3.68  | 60 | 0  | 40 | H-AL  |
| <b>Suriname</b>                                  | <b>SUR</b> | 15.05  | 0.54  | 0.07  | 21.56  | 0.15  | 0.00  | 8.24  | 0.19  | 0.00  | 44.84  | 0.88  | 0.07  | 8642.0  | 3.0    | 3     | 10 | 57 | 33 | I-AL  |
| <b>Swaziland</b>                                 | <b>SWZ</b> | 1.13   | 0.00  | 0.00  | 2.41   | 0.08  | 0.00  | 0.94  | 0.09  | 0.00  | 4.48   | 0.17  | 0.00  | 5708.6  | 2.8    | 1.5   | 83 | 0  | 16 | H     |
| <b>Sweden</b>                                    | <b>SWE</b> | 0.21   | 0.00  | 0.00  | 3.14   | 0.03  | 0.00  | 1.58  | 0.00  | 0.00  | 4.93   | 0.03  | 0.00  | 35964.8 | 479.0  | -     | 37 | 2  | 60 | H-AL  |
| <b>Switzerland</b>                               | <b>CHE</b> | 0.32   | 0.00  | 0.00  | 0.50   | 0.00  | 0.00  | 1.53  | 0.00  | 0.00  | 2.34   | 0.01  | 0.00  | 43007.5 | 491.9  | -     | 44 | 17 | 39 | H-AL  |
| <b>Syria</b>                                     | <b>SYR</b> | 0.33   | 0.00  | 0.00  | 1.43   | 0.07  | 0.00  | 4.07  | 0.82  | 0.00  | 5.83   | 0.89  | -0.01 | 4887.4  | 55.2   | 1.5   | 56 | 0  | 44 | H-AL  |
| <b>Tajikistan</b>                                | <b>TJK</b> | 1.00   | 0.00  | 0.00  | 3.58   | 0.08  | 0.00  | 3.74  | 0.22  | 0.00  | 8.32   | 0.30  | 0.00  | 2103.6  | 5.1    | 1.5   | 64 | 0  | 36 | H-AL  |
| <b>Tanzania</b>                                  | <b>TZA</b> | 102.68 | 48.10 | -0.17 | 139.66 | 22.56 | -0.12 | 68.88 | 23.54 | 0.02  | 311.22 | 94.19 | -0.27 | 1415.9  | 20.5   | 13.95 | 48 | 11 | 41 | H-AL  |
| <b>Thailand</b>                                  | <b>THA</b> | 46.77  | 2.43  | -0.07 | 52.31  | 2.67  | -0.13 | 40.15 | 6.22  | -0.29 | 139.24 | 11.32 | -0.49 | 8059.8  | 272.4  | 9.05  | 44 | 0  | 56 | H-AL  |
| <b>The Bahamas</b>                               | <b>BHS</b> | 1.12   | 0.00  | 0.00  | 10.29  | 1.14  | 0.02  | 2.47  | 1.18  | 0.00  | 13.87  | 2.32  | 0.02  | 26473.7 | 7.2    | 4.26  | -  | -  | -  | -     |
| <b>The Former Yugoslav Republic of Macedonia</b> | <b>MKD</b> | 0.27   | 0.00  | 0.00  | 0.38   | 0.00  | 0.00  | 1.25  | 0.14  | 0.00  | 1.90   | 0.15  | 0.00  | 9170.7  | 9.5    | 1.5   | 27 | 16 | 57 | H-AL  |
| <b>Togo</b>                                      | <b>TGO</b> | 3.48   | 1.65  | 0.00  | 3.41   | 0.01  | 0.00  | 2.88  | 0.13  | 0.00  | 9.78   | 1.79  | 0.00  | 826.4   | 2.9    | 1.5   | 54 | 0  | 46 | H-AL  |
| <b>Tonga</b>                                     | <b>TON</b> | 0.00   | 0.00  | 0.00  | 3.09   | 1.31  | 0.05  | 0.17  | 0.02  | 0.00  | 3.26   | 1.34  | 0.05  | 7060.6  | 0.3    | 1.59  | 25 | 0  | 75 | AL    |
| <b>Trinidad and Tobago</b>                       | <b>TTO</b> | 8.38   | 7.28  | -0.13 | 1.82   | 1.01  | 0.00  | 3.09  | 0.02  | 0.00  | 13.28  | 8.31  | -0.12 | 19817.9 | 24.1   | 2.74  | 0  | 10 | 0  | I     |
| <b>Tunisia</b>                                   | <b>TUN</b> | 0.57   | 0.00  | 0.00  | 3.62   | 0.21  | -0.01 | 4.85  | 0.21  | -0.01 | 9.04   | 0.42  | -0.02 | 8254.4  | 40.3   | 1.5   | 52 | 0  | 48 | H-AL  |
| <b>Turkey</b>                                    | <b>TUR</b> | 16.67  | 10.23 | -0.09 | 11.67  | 0.33  | -0.06 | 23.06 | 1.80  | -0.02 | 51.40  | 12.36 | -0.17 | 12476.4 | 734.9  | 5.65  | 42 | 27 | 31 | Mixed |
| <b>Turkmenistan</b>                              | <b>TKM</b> | 0.44   | 0.00  | 0.00  | 7.18   | 0.35  | -0.01 | 7.22  | 0.19  | -0.02 | 14.84  | 0.54  | -0.03 | 5971.2  | 15.3   | 1.7   | 49 | 0  | 51 | H-AL  |
| <b>Tuvalu</b>                                    | <b>TUV</b> | 0.00   | 0.00  | 0.00  | 0.79   | 0.27  | 0.00  | 0.19  | 0.02  | 0.00  | 0.97   | 0.29  | 0.00  | -       | -      | 1.5   | -  | -  | -  | -     |
| <b>Uganda</b>                                    | <b>UGA</b> | 9.01   | 0.88  | 0.00  | 36.38  | 1.74  | -0.01 | 22.81 | 6.16  | -0.01 | 68.20  | 8.78  | -0.02 | 1195.5  | 14.3   | 3.83  | 44 | 3  | 53 | H-AL  |



|                             |            |        |       |       |        |       |       |        |       |       |        |        |       |         |         |       |    |    |    |      |
|-----------------------------|------------|--------|-------|-------|--------|-------|-------|--------|-------|-------|--------|--------|-------|---------|---------|-------|----|----|----|------|
| <b>Ukraine</b>              | <b>UKR</b> | 1.58   | 0.00  | 0.00  | 6.47   | 0.15  | -0.01 | 8.43   | 2.12  | 0.03  | 16.47  | 2.27   | 0.02  | 6339.1  | 180.4   | 1.5   | 47 | 9  | 43 | H-AL |
| <b>United Arab Emirates</b> | <b>ARE</b> | 0.07   | 0.00  | 0.00  | 0.81   | 0.10  | 0.00  | 0.60   | 0.27  | 0.00  | 1.48   | 0.37   | 0.00  | 36536.8 | 198.7   | -     | 49 | 0  | 51 | H-AL |
| <b>United Kingdom</b>       | <b>GBR</b> | 1.44   | 1.05  | 0.00  | 40.79  | 20.05 | -0.20 | 10.23  | 0.51  | 0.01  | 52.46  | 21.61  | -0.19 | 34619.0 | 2674.1  | -     | 1  | 53 | 46 | I-AL |
| <b>United States</b>        | <b>USA</b> | 260.08 | 68.30 | -1.51 | 292.15 | 63.26 | -1.55 | 263.06 | 27.37 | 0.01  | 815.28 | 158.93 | -3.05 | 46380.9 | 14093.3 | -     | 2  | 70 | 28 | I    |
| <b>Uruguay</b>              | <b>URY</b> | 8.77   | 2.83  | -0.06 | 14.51  | 1.20  | 0.00  | 10.23  | 2.28  | 0.00  | 33.52  | 6.32   | -0.06 | 13163.0 | 32.2    | 1.99  | 5  | 0  | 95 | AL   |
| <b>Uzbekistan</b>           | <b>UBZ</b> | 0.13   | 0.00  | 0.00  | 6.08   | 0.42  | -0.02 | 6.62   | 0.49  | -0.04 | 12.83  | 0.91   | -0.06 | 2806.7  | 27.9    | 1.65  | 37 | 0  | 63 | H-AL |
| <b>Vanuatu</b>              | <b>VUT</b> | 0.00   | 0.00  | 0.00  | 16.85  | 5.97  | 0.00  | 3.51   | 3.10  | 0.00  | 20.36  | 9.06   | 0.00  | 4737.5  | 0.6     | 2.55  | 25 | 0  | 75 | AL   |
| <b>Vatican City</b>         | <b>VAT</b> | 0.00   | 0.00  | 0.00  | 0.00   | 0.00  | 0.00  | 0.00   | 0.00  | 0.00  | 0.00   | 0.00   | 0.00  | -       | -       | -     | 68 | 0  | 32 | H    |
| <b>Venezuela</b>            | <b>VEN</b> | 203.10 | 69.89 | -1.26 | 228.18 | 17.86 | -0.09 | 83.68  | 16.11 | -0.12 | 514.96 | 103.87 | -1.46 | 12201.0 | 314.2   | 14.49 | 2  | 65 | 33 | I-AL |
| <b>Viet Nam</b>             | <b>VNM</b> | 73.09  | 9.91  | -0.02 | 65.22  | 7.95  | -0.02 | 42.27  | 11.28 | -0.28 | 180.57 | 29.14  | -0.32 | 2942.1  | 90.6    | 12.12 | 54 | 0  | 46 | H-AL |
| <b>Yemen</b>                | <b>YEM</b> | 3.07   | 1.00  | 0.00  | 22.08  | 3.93  | 0.00  | 5.49   | 0.16  | 0.00  | 30.64  | 5.09   | -0.01 | 2457.8  | 26.6    | 4.27  | 70 | 0  | 30 | H    |
| <b>Zambia</b>               | <b>ZMB</b> | 19.26  | 0.04  | 0.00  | 70.47  | 3.64  | -0.02 | 31.49  | 2.38  | -0.01 | 121.22 | 6.06   | -0.03 | 1541.7  | 14.3    | 4.26  | 55 | 6  | 39 | H-AL |
| <b>Zimbabwe</b>             | <b>ZWE</b> | 11.76  | 5.18  | -0.08 | 31.36  | 1.00  | -0.01 | 17.88  | 0.99  | 0.00  | 61.00  | 7.17   | -0.09 | 354.9   | 3.4     | 1.72  | 63 | 4  | 33 | H-AL |
