# Supplementary material for: Spatially Explicit Trends in the Global Conservation Status of Vertebrates
Source: PLOS journal article supplement (doi:10.1371/journal.pone.0113934), 2014-11-26
Supplement: S1 (10.1371/journal.pone.0113934.s001) [file journal.pone.0113934.s001]

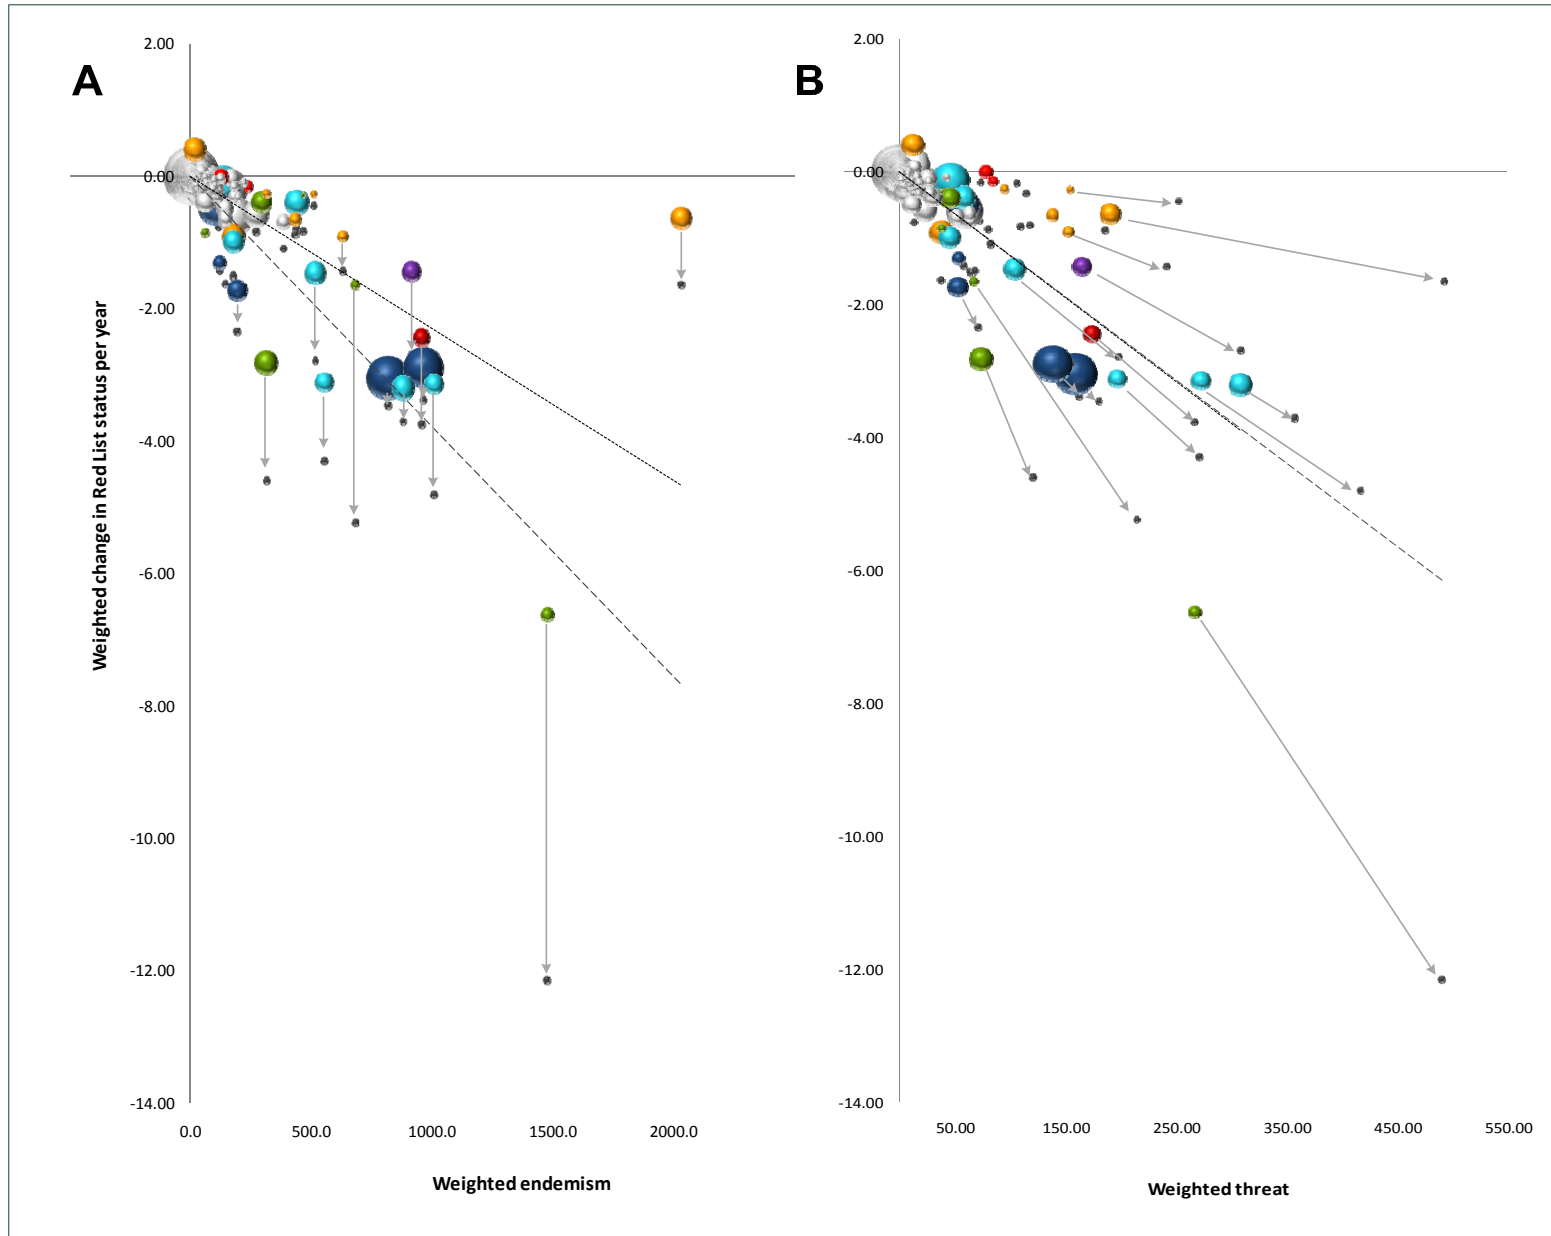

**Figure S6.** Sensitivity to variation in knowledge (Data Deficient species) of the relationship between each country's responsibility to conservation and its contribution to changes in the global conservation status of birds, mammals and amphibians. See Figure S5 for an explanation of colours and symbols. In addition, grey dots represent the new positions of countries assuming that Data Deficient species are all threatened, and have changed in Red List status at the same rate as threatened species in each country. Grey arrows present the trajectories for a subset of the countries. The long dashed lines represent the new regression lines fitted through the origin: (A)  $R^2 = 0.59$ ; (B)  $R^2 = 0.61$  ( $n=195$ ;  $p<0.01$ ).
