# Supplementary material for: Spatially Explicit Trends in the Global Conservation Status of Vertebrates
Source: PLOS journal article supplement (doi:10.1371/journal.pone.0113934), 2014-11-26
Supplement: S1 (10.1371/journal.pone.0113934.s001) [file journal.pone.0113934.s001]

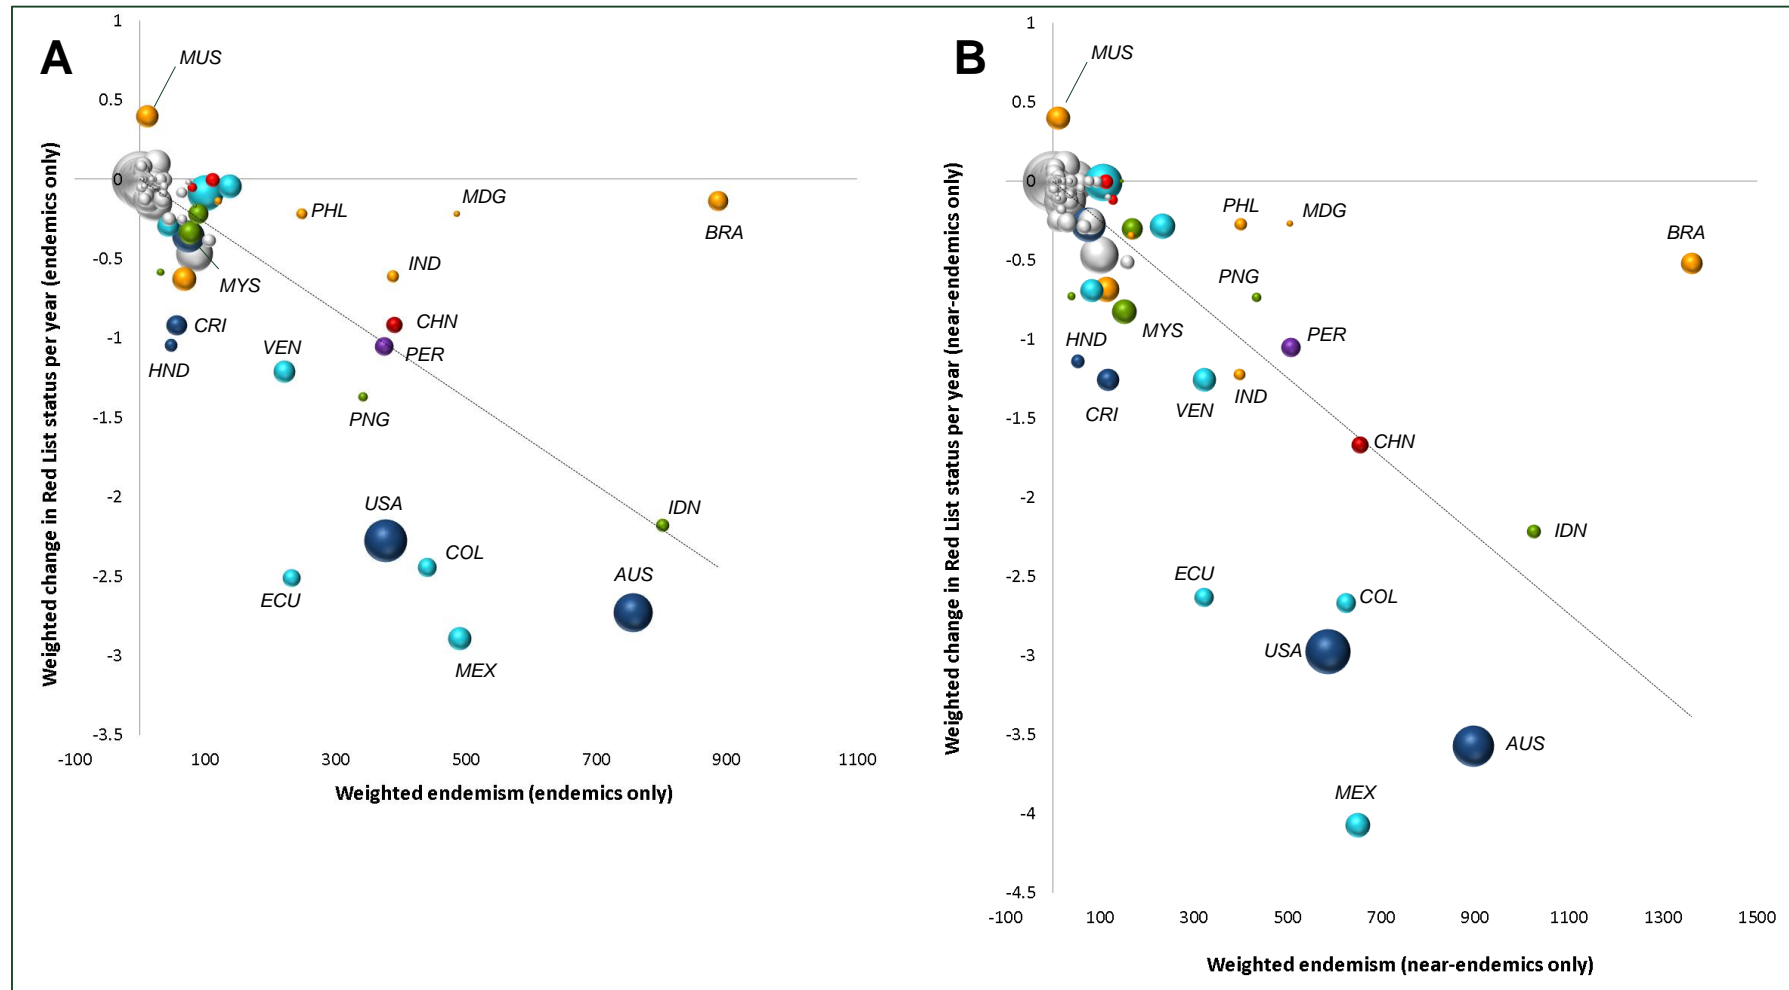

**Figure S7.** Sensitivity of the results to possible spilage across countries. Relationship between each country's responsibility to conservation and its contribution to changes in the global conservation status of birds, mammals and amphibians, when considering: A) only species endemic to single countries or B) near-endemic species (with > 70% of their range in a given country). Comparing this with Figure 4A indicates the extent to which the results are affected by 'spilage' across countries in violation of the assumptions that the species' populations, the intensity of the threats they suffer, and the effectiveness of the conservation actions they benefit from are all uniformly distributed across species' ranges. See Figures 4A and S5 for an explanation of colours and symbols. See Table S2 for country codes. Dashed lines are regression lines fitted through the origin: (A)  $R^2 = 0.55$ ; (B)  $R^2 = 0.55$ .
